# Supplementary figures and images for: Polynuclear copper(II) complexes of di-2-pyridyl ketone derivatives and tert-butylphosphonic acid: crystal structures and magnetic behaviour
Source: Royal Society of Chemistry journal article supplement (doi:10.1039/b925793d), 2010-01-01

## Figures for Supplementary Material

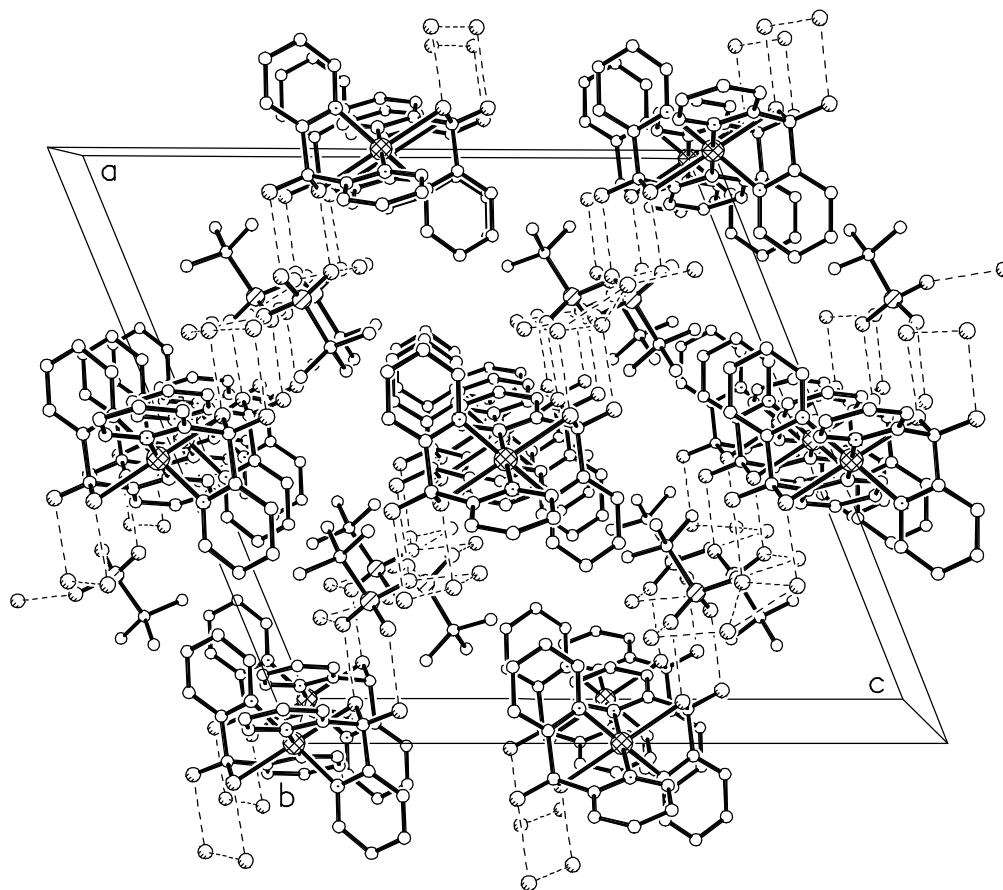

**Figure S1**

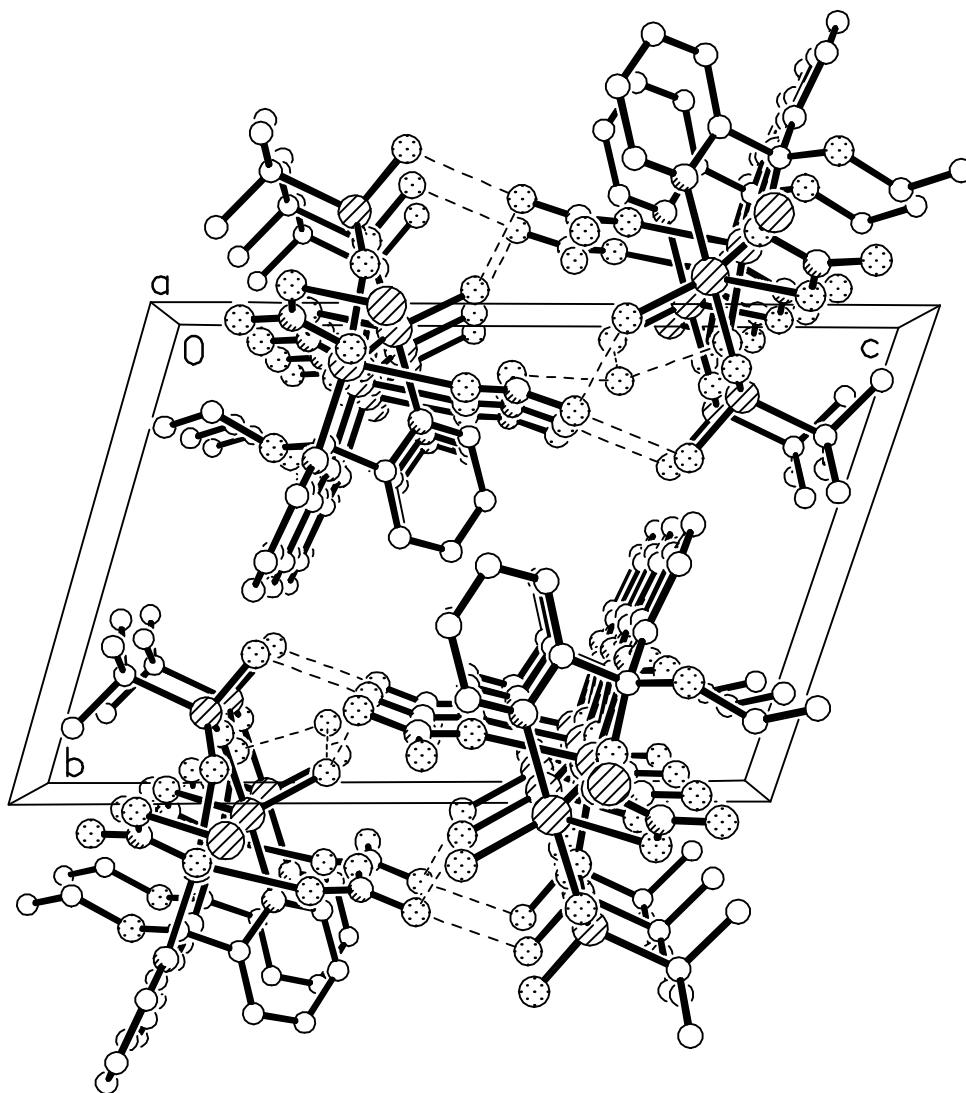

**Figure S2**

Supplement: b925793d.pdf [file b925793d.pdf]
